# Supplementary material for: Comparative dataset of experimental and computational attributes of UV/vis absorption spectra
Source: PubMed Central journal article supplement (PMC6895184; doi:10.1038/s41597-019-0306-0), 2019-12-05
Supplement: 41597_2019_306_MOESM1_ESM.pdf [file 41597_2019_306_MOESM1_ESM.pdf]

## Supplementary Information

Below is a detailed list of the scientific journals chosen for extraction alongside their publisher. Journals were selected by an expert in the field.

Bioorganic Medicinal Chemistry Letters - *Elsevier*  
Bioorganic Medicinal Chemistry - *Elsevier*  
Carbohydrate Research - *Elsevier*  
Catalysis Today - *Springer*  
Chemical Communications - *RSC*  
Chemical Data Collections - *Elsevier*  
Chemical Physics - *Elsevier*  
Chemical Science - *RSC*  
Chinese Chemical Letters - *Elsevier*  
Comptes Rendus Chimie - *Elsevier*  
Dyes And Pigments - *Elsevier*  
Electrochemistry Communications - *Elsevier*  
Inorganic Chemistry Communications - *Elsevier*  
Inorganica Chimica Acta - *Elsevier*  
Journal of Electroanalytical Chemistry - *Elsevier*  
Journal of Fluorine Chemistry - *Elsevier*  
Journal of Luminescence - *Elsevier*  
Journal of Materials Chemistry A - *RSC*  
Journal of Materials Chemistry B - *RSC*  
Journal of Materials Chemistry C - *RSC*  
Journal of Molecular Liquids - *Elsevier*  
Journal of Molecular Structure - *Elsevier*  
Journal of Organometallic Chemistry - *Elsevier*  
Journal of Photochemistry and Photobiology A : Chemistry - *Elsevier*  
Journal of Solid State Chemistry - *Elsevier*  
Materials Characterization - *Elsevier*  
Microchemical Journal - *Elsevier*  
Optical Materials - *Elsevier*

Physical Chemistry Chemical Physics - *RSC*

Polyhedron - *Elsevier*

Solid State Sciences - *Elsevier*

Tetrahedron: Asymmetry - *Elsevier*

Tetrahedron - *Elsevier*
